# Supplementary material for: Role of uL3 in Multidrug Resistance in p53-Mutated Lung Cancer Cells
Source: PubMed Central journal article supplement (PMC5372563; doi:10.3390/ijms18030547), 2017-03-03
Supplement: ijms-18-00547-s001.pdf [file ijms-18-00547-s001.pdf]

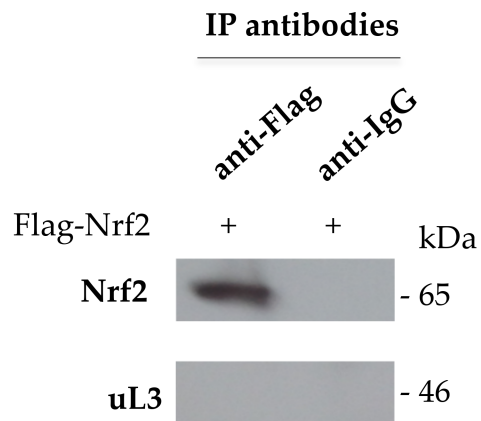

**Figure S1**

**Figure S1.** *In vivo* interaction between Nrf2 and uL3. Calu-6 cells were transiently transfected with a plasmid encoding Flag-Nrf2. Nrf2 was specifically immunoprecipitated with antibodies anti-Flag. The presence of Nrf2 and uL3 was tested with antibodies against the endogenous Nrf2 and uL3. No interaction between Nrf2 and uL3 was found.

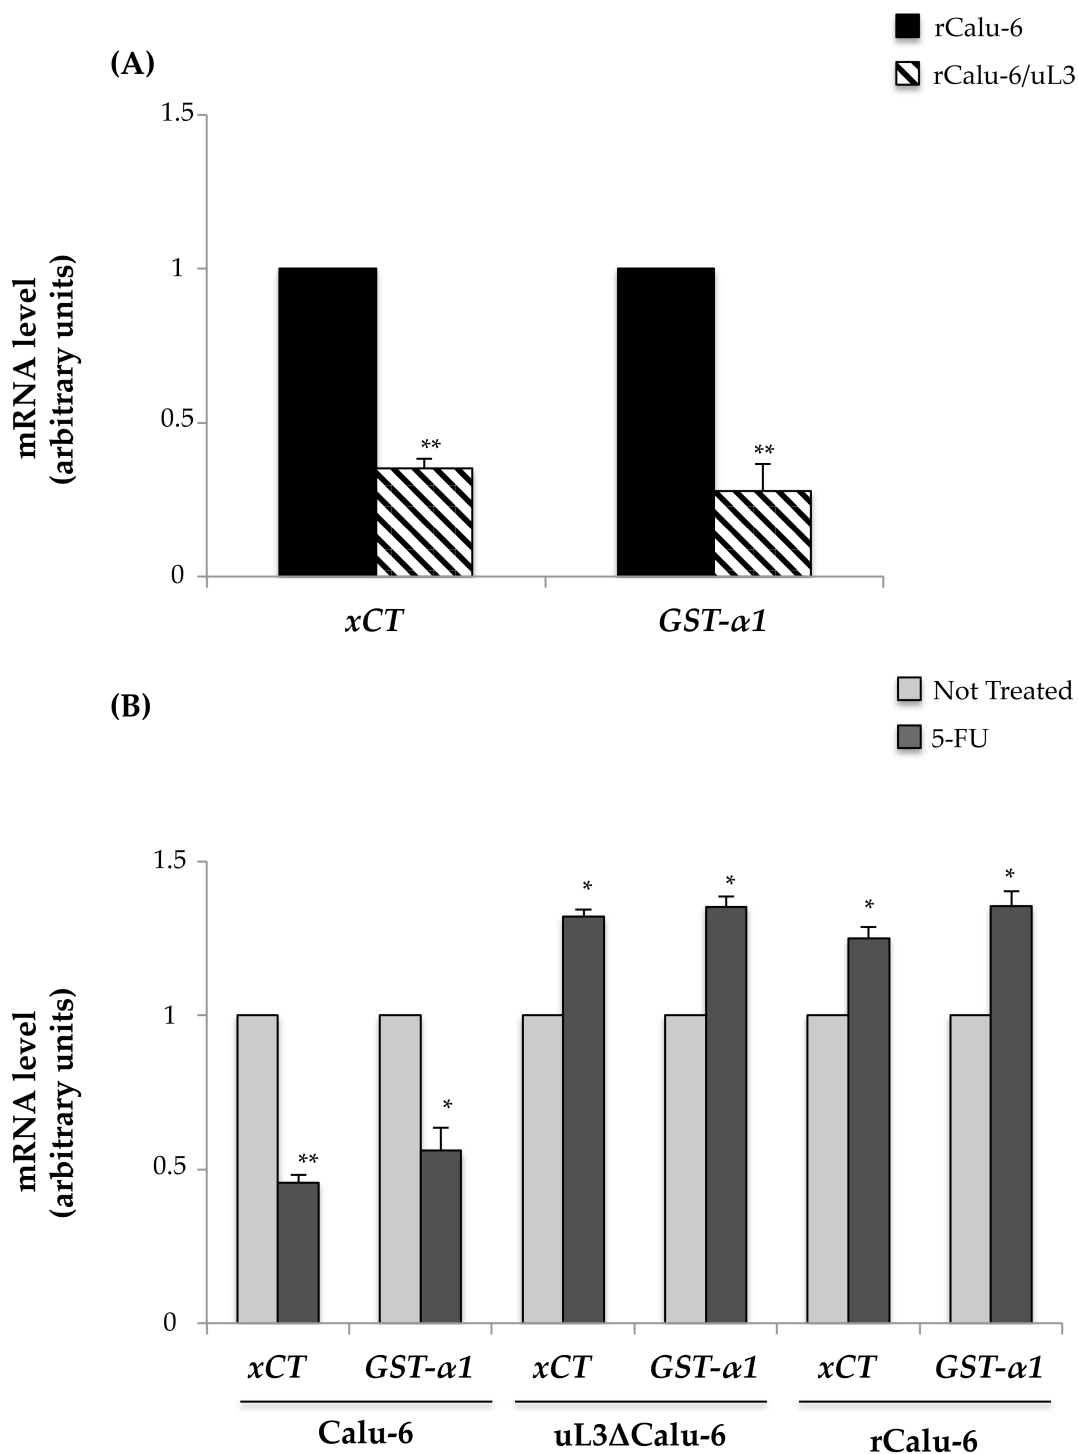

**Figure S2.** (A) Total RNA from rCalu-6 and rCalu-6/uL3 cells was subjected to RT-qPCR with primers specific for indicated mRNAs. Quantification of signals is shown. \*\*  $p < 0.01$ , \*  $p < 0.05$  vs. mRNA levels in rCalu-6 cells set at 1. (B) Calu-6, uL3ΔCalu-6 and rCalu-6 cells were treated with 10  $\mu$ M 5-FU for 48 h and then extracted total RNA was subjected to RT-qPCR with primers specific for indicated mRNAs. Quantification of signals is shown. \*\*  $p < 0.01$ , \*  $p < 0.05$  vs. mRNA levels in untreated cells set at 1.

**Figure S2**
